# Supplementary material
Source: publisher site journal article supplement (https://www.dovepress.com/article/556618)
Supplement: Supplementary file 1 [file Table%20S1.docx]

Table S1. shRNA Oligonucleotide sequences

| Name | Oligonucleotide Sequence (5'→3') |
| --- | --- |
| shLRG1#1-F | CCGGGCAACCCGCTTAACAAATAATCTCGAGATTATTTGTTAAGCGGGTTGCTTTTTG |
| shLRG1#1-R | AATTCAAAAAGCAACCCGCTTAACAAATAATCTCGAGATTATTTGTTAAGCGGGTTGC |
| shLRG1#2-F | CCGGTGTCAACCACCTGCCGAAATCCTCGAGGATTTCGGCAGGTGGTTGACATTTTTG |
| shLRG1#2-R | AATTCAAAAATGTCAACCACCTGCCGAAATCCTCGAGGATTTCGGCAGGTGGTTGACA |
| shLRG1#3-F | CCGGCATGCTGGACCTCTCCAATAACTCGAGTTATTGGAGAGGTCCAGCATGTTTTTG |
| shLRG1#3-R | AATTCAAAAACATGCTGGACCTCTCCAATAACTCGAGTTATTGGAGAGGTCCAGCATG |

Table S2. qRT-PCR primers sequences

| Name | Nucleotide Sequence (5'→3') |
| --- | --- |
| LRG1-F | GGACACCCTGGTATTGAAAGAAA |
| LRG1-R | TAGCCGTTCTAATTGCAGCGG |
